# Supplementary material for: Trends in characteristics and multi-product use among adolescents who use electronic cigarettes, United States 2011-2015
Source: PubMed Central journal article supplement (PMC5419603; doi:10.1371/journal.pone.0177073), 2017-05-05
Supplement: pone.0177073.s001.pdf [file pone.0177073.s001.pdf]

**S1 Table.** Past 30-day electronic cigarette use according to race/ethnicity, 2011-2015

| <b>Past month e-cigarette use, females, grades 6-12, % (SE)</b> |          |              |              |                        |                          |
|-----------------------------------------------------------------|----------|--------------|--------------|------------------------|--------------------------|
|                                                                 | <b>n</b> | <b>White</b> | <b>Black</b> | <b>Hispanic/Latina</b> | <b>Other<sup>1</sup></b> |
| All years                                                       | 50,034   | 4.6 (0.3)    | 2.6* (0.3)   | 5.3 (0.4)              | 3.5 (0.5)                |
| 2011                                                            | 9,315    | 0.6 (0.1)    | 0.4 (0.2)    | 0.5 (0.2)              | 0.2 (0.1)                |
| 2012                                                            | 12,275   | 1.7 (0.2)    | 0.4* (0.2)   | 1.6 (0.4)              | 0.9 (0.6)                |
| 2013                                                            | 9,177    | 2.5 (0.4)    | 1.3 (0.4)    | 3.0 (0.5)              | 1.8 (0.7)                |
| 2014                                                            | 10,645   | 8.8 (0.9)    | 4.1* (0.9)   | 9.8 (1.2)              | 5.8 (1.4)                |
| 2015                                                            | 8,622    | 9.4 (1.0)    | 7.0 (1.1)    | 10.9 (1.0)             | 9.0 (2.1)                |
| Trend <sup>2</sup>                                              |          | <0.001       | <0.001       | <0.001                 | <0.001                   |
| <b>Past month e-cigarette use, males, grades 6-12, % (SE)</b>   |          |              |              |                        |                          |
|                                                                 | <b>n</b> | <b>White</b> | <b>Black</b> | <b>Hispanic/Latino</b> | <b>Other<sup>1</sup></b> |
| All years                                                       | 50,977   | 6.7 (0.3)    | 3.7* (0.3)   | 7.4 (0.4)              | 5.9 (1.1)                |
| 2011                                                            | 9,284    | 1.9 (0.3)    | 0.8 (0.5)    | 1.5 (0.4)              | 1.1 (0.6)                |
| 2012                                                            | 12,369   | 3.0 (0.4)    | 1.9 (0.6)    | 3.2 (0.6)              | 1.9 (0.8)                |
| 2013                                                            | 9,216    | 3.8 (0.5)    | 2.9 (0.7)    | 4.2 (0.7)              | 3.1 (1.2)                |
| 2014                                                            | 11,150   | 11.3 (1.1)   | 5.9* (1.0)   | 12.1 (1.3)             | 8.0 (1.6)                |
| 2015                                                            | 8,958    | 14.0 (1.0)   | 7.1* (1.2)   | 14.4 (1.2)             | 16.3 (5.4)               |
| Trend <sup>2</sup>                                              |          | <0.001       | <0.001       | <0.001                 | <0.001                   |

**S1 Table** shows the prevalence of past 30-day e-cigarette use in the National Youth Tobacco Survey according to categories of race/ethnicity. E-cigarette use increased in all race/ethnicity categories. Generally, the lowest prevalence of past 30-day use was among individuals who identified as Black.

1. Individuals in other category identified as Asian (75.2%), American Indian/Alaska Native (14.0%), and Native Hawaiian/Other Pacific Islander (10.8%).

2. P-for-linear trend, 2011-2015

\*Statistically significant ( $P < 0.001$ ) difference in prevalence of past 30-day e-cigarettes use versus individuals who identified as White in that survey year

Marginal percentages adjusted across years for grade in school. Standard errors account for sampling design and multiple imputation.
