# Supplementary material for: Trends in characteristics and multi-product use among adolescents who use electronic cigarettes, United States 2011-2015
Source: PubMed Central journal article supplement (PMC5419603; doi:10.1371/journal.pone.0177073), 2017-05-05
Supplement: pone.0177073.s002.pdf [file pone.0177073.s002.pdf]

## Supplemental Tables: Sensitivity Analyses

**S2. Table 1.** Electronic cigarette ever use and past month use according to ever use (yes or no) and past month use (yes or no) of other tobacco products, 2011-2015

*COMPLETE CASE ANALYSIS: participants with missing values excluded; no imputation*

| <b>Females, grades 6-12</b>            |                             |                             |                                            |                             |        |                             |                      |                                                   |                             |        |                             |                      |
|----------------------------------------|-----------------------------|-----------------------------|--------------------------------------------|-----------------------------|--------|-----------------------------|----------------------|---------------------------------------------------|-----------------------------|--------|-----------------------------|----------------------|
|                                        | Overall<br>(n: sample size) |                             | Ever use of any other tobacco <sup>1</sup> |                             |        |                             | p-value <sup>2</sup> | Past 30-day use of any other tobacco <sup>1</sup> |                             |        |                             | p-value <sup>2</sup> |
|                                        |                             |                             | Yes<br>(n: sample size)                    | No<br>(n: sample size)      |        |                             |                      | Yes<br>(n: sample size)                           | No<br>(n: sample size)      |        |                             |                      |
| <b>Ever use of e-cigarettes:</b>       |                             |                             |                                            |                             |        |                             |                      |                                                   |                             |        |                             |                      |
|                                        | n                           | % e-cigarette<br>ever (SE)  | n                                          | % e-cigarette<br>ever (SE)  | n      | % e-cigarette<br>ever (SE)  |                      | n                                                 | % e-cigarette<br>ever (SE)  | n      | % e-cigarette<br>ever (SE)  |                      |
| All years                              | 44,010                      | 7.9 (0.3)                   | 12,335                                     | 24.3 (0.7)                  | 31,675 | 1.3 (0.2)                   | <0.001               | 4,971                                             | 35.2 (1.0)                  | 39,039 | 4.2 (0.2)                   | <0.001               |
| 2011                                   | 8,068                       | 2.4 (0.3)                   | 2,470                                      | 7.1 (0.7)                   | 5,598  | 0.2 (0.1)                   | <0.001               | 1,005                                             | 12.6 (1.4)                  | 7,063  | 0.8 (0.2)                   | <0.001               |
| 2012                                   | 11,063                      | 5.5 (0.6)                   | 3,070                                      | 17.6 (1.2)                  | 7,993  | 0.5 (0.2)                   | <0.001               | 1,270                                             | 27.3 (2.1)                  | 9,793  | 2.5 (0.3)                   | <0.001               |
| 2013                                   | 7,985                       | 7.0 (0.6)                   | 2,357                                      | 22.0 (1.9)                  | 5,628  | 0.7 (0.2)                   | <0.001               | 951                                               | 33.8 (3.7)                  | 7,034  | 3.2 (0.5)                   | <0.001               |
| 2014                                   | 9,279                       | 17.8 (1.6)                  | 2,449                                      | 50.8 (2.2)                  | 6,830  | 4.3 (0.8)                   | <0.001               | 1,006                                             | 66.5 (3.2)                  | 8,273  | 11.3 (1.3)                  | <0.001               |
| 2015                                   | 7,615                       | 23.6 (0.9)                  | 1,989                                      | 66.9 (1.6)                  | 5,626  | 7.6 (0.5)                   | <0.001               | 739                                               | 81.7 (2.1)                  | 6,876  | 17.4 (0.8)                  | <0.001               |
| Trend <sup>3</sup>                     |                             | <0.001                      |                                            | <0.001                      |        | <0.001                      |                      |                                                   | <0.001                      |        | <0.001                      |                      |
| <b>Past month use of e-cigarettes:</b> |                             |                             |                                            |                             |        |                             |                      |                                                   |                             |        |                             |                      |
|                                        | n                           | % e-cig. past<br>month (SE) | n                                          | % e-cig. past<br>month (SE) | n      | % e-cig. past<br>month (SE) |                      | n                                                 | % e-cig. past<br>month (SE) | n      | % e-cig. past<br>month (SE) |                      |
| All years                              | 44,010                      | 3.0 (0.2)                   | 12,335                                     | 9.4 (0.5)                   | 31,675 | 0.5 (0.1)                   | <0.001               | 4,971                                             | 17.9 (0.8)                  | 39,039 | 1.0 (0.1)                   | <0.001               |
| 2011                                   | 8,068                       | 0.6 (0.1)                   | 2,470                                      | 1.6 (0.3)                   | 5,598  | 0.1 (0.0)                   | <0.001               | 1,005                                             | 3.4 (0.7)                   | 7,063  | 0.1 (0.1)                   | <0.001               |
| 2012                                   | 11,063                      | 1.4 (0.2)                   | 3,070                                      | 4.6 (0.5)                   | 7,993  | 0.1 (0.1)                   | <0.001               | 1,270                                             | 10.5 (1.2)                  | 9,793  | 0.2 (0.1)                   | <0.001               |
| 2013                                   | 7,985                       | 2.4 (0.3)                   | 2,357                                      | 7.5 (1.0)                   | 5,628  | 0.3 (0.2)                   | <0.001               | 951                                               | 14.8 (2.1)                  | 7,034  | 0.7 (0.2)                   | <0.001               |
| 2014                                   | 9,279                       | 8.0 (0.9)                   | 2,449                                      | 23.8 (2.0)                  | 6,830  | 1.5 (0.4)                   | <0.001               | 1,006                                             | 43.2 (3.2)                  | 8,273  | 3.3 (0.6)                   | <0.001               |
| 2015                                   | 7,615                       | 8.6 (0.6)                   | 1,989                                      | 27.3 (1.4)                  | 5,626  | 1.6 (0.2)                   | <0.001               | 739                                               | 52.5 (3.0)                  | 6,876  | 3.9 (0.4)                   | <0.001               |
| Trend <sup>3</sup>                     |                             | <0.001                      |                                            | <0.001                      |        | <0.001                      |                      |                                                   | <0.001                      |        | <0.001                      |                      |
| <b>Males, grades 6-12</b>              |                             |                             |                                            |                             |        |                             |                      |                                                   |                             |        |                             |                      |
|                                        | Overall<br>(n: sample size) |                             | Ever use of any other tobacco <sup>1</sup> |                             |        |                             | p-value <sup>2</sup> | Past 30-day use of any other tobacco <sup>1</sup> |                             |        |                             | p-value <sup>2</sup> |
|                                        |                             |                             | Yes<br>(n: sample size)                    | No<br>(n: sample size)      |        |                             |                      | Yes<br>(n: sample size)                           | No<br>(n: sample size)      |        |                             |                      |
| <b>Ever use of e-cigarettes:</b>       |                             |                             |                                            |                             |        |                             |                      |                                                   |                             |        |                             |                      |
|                                        | n                           | % e-cigarette<br>ever (SE)  | n                                          | % e-cigarette<br>ever (SE)  | n      | % e-cigarette<br>ever (SE)  |                      | n                                                 | % e-cigarette<br>ever (SE)  | n      | % e-cigarette<br>ever (SE)  |                      |
| All years                              | 42,232                      | 10.2 (0.3)                  | 14,026                                     | 26.7 (0.7)                  | 28,206 | 1.6 (0.1)                   | <0.001               | 6,784                                             | 37.8 (1.0)                  | 35,448 | 4.5 (0.2)                   | <0.001               |
| 2011                                   | 7,553                       | 3.9 (0.5)                   | 2,831                                      | 9.9 (1.1)                   | 4,722  | 0.4 (0.2)                   | <0.001               | 1,385                                             | 17.3 (1.9)                  | 6,168  | 0.9 (0.3)                   | <0.001               |
| 2012                                   | 10,532                      | 7.7 (0.6)                   | 3,596                                      | 21.8 (1.3)                  | 6,936  | 0.4 (0.1)                   | <0.001               | 1,822                                             | 34.1 (2.0)                  | 8,710  | 2.4 (0.5)                   | <0.001               |
| 2013                                   | 7,452                       | 9.2 (0.6)                   | 2,557                                      | 25.9 (1.3)                  | 4,895  | 0.6 (0.2)                   | <0.001               | 1,227                                             | 41.4 (1.7)                  | 6,225  | 3.2 (0.5)                   | <0.001               |
| 2014                                   | 9,269                       | 20.1 (0.9)                  | 2,861                                      | 52.8 (1.8)                  | 6,408  | 5.2 (0.6)                   | <0.001               | 1,332                                             | 65.1 (2.5)                  | 7,937  | 12.7 (1.2)                  | <0.001               |
| 2015                                   | 7,426                       | 27.4 (1.0)                  | 2,181                                      | 70.3 (1.4)                  | 5,245  | 9.3 (0.6)                   | <0.001               | 1,018                                             | 79.9 (2.2)                  | 6,408  | 18.8 (0.9)                  | <0.001               |
| Trend <sup>3</sup>                     |                             | <0.001                      |                                            | <0.001                      |        | <0.001                      |                      |                                                   | <0.001                      |        | <0.001                      |                      |
| <b>Past month use of e-cigarettes:</b> |                             |                             |                                            |                             |        |                             |                      |                                                   |                             |        |                             |                      |
|                                        | n                           | % e-cig. past<br>month (SE) | n                                          | % e-cig. past<br>month (SE) | n      | % e-cig. past<br>month (SE) |                      | n                                                 | % e-cig. past<br>month (SE) | n      | % e-cig. past<br>month (SE) |                      |
| All years                              | 42,232                      | 4.3 (0.2)                   | 14,026                                     | 11.7 (0.6)                  | 28,206 | 0.6 (0.1)                   | <0.001               | 6,784                                             | 19.6 (0.9)                  | 35,448 | 1.3 (0.1)                   | <0.001               |
| 2011                                   | 7,553                       | 1.5 (0.2)                   | 2,831                                      | 3.9 (0.6)                   | 4,722  | 0.2 (0.1)                   | <0.001               | 1,385                                             | 7.1 (1.1)                   | 6,168  | 0.2 (0.1)                   | <0.001               |
| 2012                                   | 10,532                      | 2.7 (0.3)                   | 3,596                                      | 7.7 (0.8)                   | 6,936  | 0.2 (0.1)                   | <0.001               | 1,822                                             | 13.8 (1.4)                  | 8,710  | 0.4 (0.1)                   | <0.001               |
| 2013                                   | 7,452                       | 3.7 (0.4)                   | 2,557                                      | 10.3 (1.0)                  | 4,895  | 0.3 (0.2)                   | <0.001               | 1,227                                             | 19.8 (1.8)                  | 6,225  | 0.6 (0.2)                   | <0.001               |
| 2014                                   | 9,269                       | 9.6 (0.8)                   | 2,861                                      | 26.9 (2.0)                  | 6,408  | 1.8 (0.3)                   | <0.001               | 1,332                                             | 42.8 (3.2)                  | 7,937  | 4.1 (0.6)                   | <0.001               |
| 2015                                   | 7,426                       | 11.8 (0.7)                  | 2,181                                      | 33.5 (1.8)                  | 5,245  | 2.7 (0.3)                   | <0.001               | 1,018                                             | 52.7 (3.1)                  | 6,408  | 5.2 (0.5)                   | <0.001               |
| Trend <sup>3</sup>                     |                             | <0.001                      |                                            | <0.001                      |        | <0.001                      |                      |                                                   | <0.001                      |        | <0.001                      |                      |

In all years, e-cigarette use (ever and past 30-days) was associated with use of other tobacco products, but e-cigarette use prevalence increased from 2011-2015 among both other tobacco users and other tobacco non-users.

1. Other tobacco includes: cigarettes, cigars, pipes, bidis, kreteks (2011-2013), conventional smokeless tobacco, snus, dissolvable tobacco, and hookah.

2. Chi-square test for difference in use of e-cigarettes between users and non-users of other tobacco products

3. P-for-linear trend, 2011-2015

Marginal percentages adjusted across years for grade in school and race/ethnicity.

Abbreviations: e-cig. = e-cigarette; n = sample size (denominator); SE = standard error

**S2. Table 2.** Past month use of other tobacco products according to past month use (yes or no) of electronic cigarettes, 2011-2015

*COMPLETE CASE ANALYSIS: participants with missing values excluded; no imputation*

|                                                              | Females, grades 6-12        |                      |                                          |                      |                        |                      | Males, grades 6-12          |        |                                          |       |                        |        |                    |   |
|--------------------------------------------------------------|-----------------------------|----------------------|------------------------------------------|----------------------|------------------------|----------------------|-----------------------------|--------|------------------------------------------|-------|------------------------|--------|--------------------|---|
|                                                              | Overall<br>(n: sample size) |                      | Past 30-day e-cigarette use <sup>1</sup> |                      |                        |                      | Overall<br>(n: sample size) |        | Past 30-day e-cigarette use <sup>1</sup> |       |                        |        |                    |   |
|                                                              |                             |                      | Yes<br>(n: sample size)                  |                      | No<br>(n: sample size) |                      |                             |        | Yes<br>(n: sample size)                  |       | No<br>(n: sample size) |        |                    |   |
| <b>Any other tobacco in past month:</b>                      |                             |                      |                                          |                      |                        |                      |                             |        |                                          |       |                        |        |                    |   |
|                                                              | n                           | % other tobacco (SE) | n                                        | % other tobacco (SE) | n                      | % other tobacco (SE) | *                           | n      | % other tobacco (SE)                     | n     | % other tobacco (SE)   | *      |                    |   |
| All years                                                    | 44,010                      | 11.3 (0.3)           | 1,693                                    | 65.1 (1.9)           | 42,317                 | 9.0 (0.2)            | *                           | 42,232 | 16.2 (0.4)                               | 2,421 | 70.1 (1.2)             | 39,811 | 12.9 (0.4)         | * |
| 2011                                                         | 8,068                       | 12.6 (0.7)           | 56                                       | 79.3 (7.1)           | 8,012                  | 12.2 (0.7)           | *                           | 7,553  | 18.9 (0.9)                               | 97    | 88.2 (3.7)             | 7,456  | 17.6 (0.7)         | * |
| 2012                                                         | 11,063                      | 11.6 (0.6)           | 146                                      | 93.6 (2.4)           | 10,917                 | 10.4 (0.6)           | *                           | 10,532 | 17.6 (0.8)                               | 284   | 88.8 (2.6)             | 10,248 | 15.5 (0.5)         | * |
| 2013                                                         | 7,985                       | 11.6 (0.6)           | 180                                      | 75.2 (4.3)           | 7,805                  | 10.0 (0.5)           | *                           | 7,452  | 16.4 (0.9)                               | 262   | 87.7 (2.2)             | 7,190  | 13.6 (0.6)         | * |
| 2014                                                         | 9,279                       | 10.9 (0.5)           | 676                                      | 63.2 (2.8)           | 8,603                  | 6.7 (0.5)            | *                           | 9,269  | 14.6 (0.7)                               | 888   | 65.8 (2.2)             | 8,381  | 9.5 (0.5)          | * |
| 2015                                                         | 7,615                       | 9.6 (0.7)            | 635                                      | 58.4 (3.3)           | 6,980                  | 5.1 (0.5)            | *                           | 7,426  | 13.8 (0.8)                               | 890   | 61.4 (2.2)             | 6,536  | 7.6 (0.8)          | * |
| Trend <sup>2</sup>                                           |                             | 0.014                |                                          | <0.001               |                        | <0.001               |                             |        | 0.001                                    |       | 0.002                  |        | <0.001             |   |
| <b>Cigarettes in past month:</b>                             |                             |                      |                                          |                      |                        |                      |                             |        |                                          |       |                        |        |                    |   |
|                                                              | n                           | % cigarettes (SE)    | n                                        | % cigarettes (SE)    | n                      | % cigarettes (SE)    | *                           | n      | % cigarettes (SE)                        | n     | % cigarettes (SE)      | n      | % cigarettes (SE)  | * |
| All years                                                    | 44,010                      | 6.8 (0.2)            | 1,693                                    | 41.9 (1.6)           | 42,317                 | 5.3 (0.2)            | *                           | 42,232 | 8.6 (0.3)                                | 2,421 | 43.3 (1.3)             | 39,811 | 6.4 (0.2)          | * |
| 2011                                                         | 8,068                       | 9.2 (0.7)            | 56                                       | 70.9 (7.6)           | 8,012                  | 8.7 (0.7)            | *                           | 7,553  | 11.2 (0.7)                               | 97    | 71.6 (5.5)             | 7,456  | 10.2 (0.7)         | * |
| 2012                                                         | 11,063                      | 7.4 (0.5)            | 146                                      | 84.3 (4.5)           | 10,917                 | 6.3 (0.4)            | *                           | 10,532 | 10.0 (0.6)                               | 284   | 76.6 (3.1)             | 10,248 | 8.1 (0.5)          | * |
| 2013                                                         | 7,985                       | 7.3 (0.5)            | 180                                      | 65.3 (4.6)           | 7,805                  | 5.9 (0.4)            | *                           | 7,452  | 8.7 (0.6)                                | 262   | 67.5 (4.0)             | 7,190  | 6.5 (0.6)          | * |
| 2014                                                         | 9,279                       | 5.1 (0.3)            | 676                                      | 37.5 (2.2)           | 8,603                  | 2.4 (0.3)            | *                           | 9,269  | 6.6 (0.6)                                | 888   | 36.5 (1.9)             | 8,381  | 3.6 (0.5)          | * |
| 2015                                                         | 7,615                       | 4.9 (0.5)            | 635                                      | 31.3 (2.9)           | 6,980                  | 2.5 (0.4)            | *                           | 7,426  | 6.1 (0.6)                                | 890   | 29.6 (2.4)             | 6,536  | 3.0 (0.5)          | * |
| Trend <sup>2</sup>                                           |                             | <0.001               |                                          | <0.001               |                        | <0.001               |                             |        | <0.001                                   |       | <0.001                 |        | <0.001             |   |
| <b>Non-cigarette combustibles<sup>3</sup> in past month:</b> |                             |                      |                                          |                      |                        |                      |                             |        |                                          |       |                        |        |                    |   |
|                                                              | n                           | % combustible (SE)   | n                                        | % combustible (SE)   | n                      | % combustible (SE)   | *                           | n      | % combustible (SE)                       | n     | % combustible (SE)     | n      | % combustible (SE) | * |
| All years                                                    | 44,010                      | 5.4 (0.2)            | 1,693                                    | 29.5 (1.3)           | 42,317                 | 4.4 (0.2)            | *                           | 42,232 | 9.3 (0.2)                                | 2,421 | 43.1 (1.2)             | 39,811 | 7.2 (0.2)          | * |
| 2011                                                         | 8,068                       | 6.3 (0.4)            | 56                                       | 40.1 (8.6)           | 8,012                  | 6.1 (0.4)            | *                           | 7,553  | 11.0 (0.5)                               | 97    | 64.2 (6.2)             | 7,456  | 10.0 (0.5)         | * |
| 2012                                                         | 11,063                      | 6.6 (0.4)            | 146                                      | 54.9 (4.2)           | 10,917                 | 5.9 (0.4)            | *                           | 10,532 | 11.1 (0.5)                               | 284   | 69.1 (3.8)             | 10,248 | 9.4 (0.5)          | * |
| 2013                                                         | 7,985                       | 6.5 (0.4)            | 180                                      | 47.5 (4.9)           | 7,805                  | 5.5 (0.4)            | *                           | 7,452  | 10.3 (0.6)                               | 262   | 62.9 (3.0)             | 7,190  | 8.3 (0.5)          | * |
| 2014                                                         | 9,279                       | 3.9 (0.3)            | 676                                      | 26.2 (2.3)           | 8,603                  | 2.0 (0.2)            | *                           | 9,269  | 7.0 (0.5)                                | 888   | 37.4 (2.2)             | 8,381  | 3.9 (0.4)          | * |
| 2015                                                         | 7,615                       | 4.0 (0.3)            | 635                                      | 22.9 (1.9)           | 6,980                  | 2.2 (0.3)            | *                           | 7,426  | 6.8 (0.5)                                | 890   | 32.7 (1.8)             | 6,536  | 3.5 (0.4)          | * |
| Trend <sup>2</sup>                                           |                             | <0.001               |                                          | <0.001               |                        | <0.001               |                             |        | <0.001                                   |       | <0.001                 |        | <0.001             |   |
| <b>Smokeless tobacco<sup>4</sup> in past month:</b>          |                             |                      |                                          |                      |                        |                      |                             |        |                                          |       |                        |        |                    |   |
|                                                              | n                           | % smokeless (SE)     | n                                        | % smokeless (SE)     | n                      | % smokeless (SE)     | *                           | n      | % smokeless (SE)                         | n     | % smokeless (SE)       | n      | % smokeless (SE)   | * |
| All years                                                    | 44,010                      | 1.5 (0.1)            | 1,693                                    | 12.2 (0.9)           | 42,317                 | 1.0 (0.1)            | *                           | 42,232 | 6.8 (0.3)                                | 2,421 | 31.3 (1.5)             | 39,811 | 5.3 (0.3)          | * |
| 2011                                                         | 8,068                       | 1.8 (0.2)            | 56                                       | 21.2 (7.2)           | 8,012                  | 1.7 (0.2)            | *                           | 7,553  | 8.5 (0.8)                                | 97    | 51.5 (6.7)             | 7,456  | 7.7 (0.8)          | * |
| 2012                                                         | 11,063                      | 1.8 (0.2)            | 146                                      | 28.5 (3.6)           | 10,917                 | 1.4 (0.2)            | *                           | 10,532 | 7.4 (0.6)                                | 284   | 46.6 (3.7)             | 10,248 | 6.3 (0.5)          | * |
| 2013                                                         | 7,985                       | 1.4 (0.2)            | 180                                      | 18.7 (3.8)           | 7,805                  | 0.9 (0.2)            | *                           | 7,452  | 6.0 (0.7)                                | 262   | 30.0 (3.9)             | 7,190  | 5.1 (0.7)          | * |
| 2014                                                         | 9,279                       | 1.2 (0.1)            | 676                                      | 9.8 (1.2)            | 8,603                  | 0.5 (0.1)            | *                           | 9,269  | 6.4 (0.6)                                | 888   | 31.0 (2.9)             | 8,381  | 3.9 (0.5)          | * |
| 2015                                                         | 7,615                       | 1.3 (0.3)            | 635                                      | 9.4 (1.4)            | 6,980                  | 0.6 (0.2)            | *                           | 7,426  | 5.7 (0.7)                                | 890   | 25.9 (2.5)             | 6,536  | 3.1 (0.6)          | * |
| Trend <sup>2</sup>                                           |                             | 0.058                |                                          | <0.001               |                        | 0.001                |                             |        | 0.025                                    |       | <0.001                 |        | <0.001             |   |
| <b>Hookah in past month:</b>                                 |                             |                      |                                          |                      |                        |                      |                             |        |                                          |       |                        |        |                    |   |
|                                                              | n                           | % hookah (SE)        | n                                        | % hookah (SE)        | n                      | % hookah (SE)        | *                           | n      | % hookah (SE)                            | n     | % hookah (SE)          | n      | % hookah (SE)      | * |
| All years                                                    | 44,010                      | 3.9 (0.1)            | 1,693                                    | 35.7 (2.1)           | 42,317                 | 2.5 (0.1)            | *                           | 42,232 | 4.2 (0.2)                                | 2,421 | 30.7 (1.5)             | 39,811 | 2.5 (0.1)          | * |
| 2011                                                         | 8,068                       | 2.4 (0.2)            | 56                                       | 17.5 (6.5)           | 8,012                  | 2.3 (0.2)            | *                           | 7,553  | 3.0 (0.4)                                | 97    | 32.7 (5.9)             | 7,456  | 2.5 (0.4)          | * |
| 2012                                                         | 11,063                      | 2.9 (0.3)            | 146                                      | 27.9 (3.7)           | 10,917                 | 2.6 (0.3)            | *                           | 10,532 | 4.2 (0.3)                                | 284   | 39.0 (3.5)             | 10,248 | 3.2 (0.3)          | * |
| 2013                                                         | 7,985                       | 3.2 (0.3)            | 180                                      | 29.6 (4.4)           | 7,805                  | 2.5 (0.3)            | *                           | 7,452  | 3.5 (0.3)                                | 262   | 31.6 (3.3)             | 7,190  | 2.4 (0.3)          | * |
| 2014                                                         | 9,279                       | 6.6 (0.4)            | 676                                      | 40.9 (3.5)           | 8,603                  | 3.8 (0.4)            | *                           | 9,269  | 5.5 (0.4)                                | 888   | 31.0 (2.9)             | 8,381  | 2.9 (0.3)          | * |
| 2015                                                         | 7,615                       | 4.4 (0.4)            | 635                                      | 34.9 (3.2)           | 6,980                  | 1.6 (0.2)            | *                           | 7,426  | 4.6 (0.4)                                | 890   | 27.9 (2.4)             | 6,536  | 1.6 (0.3)          | * |
| Trend <sup>2</sup>                                           |                             | <0.001               |                                          | 0.098                |                        | 0.906                |                             |        | <0.001                                   |       | 0.071                  |        | 0.097              |   |

1. Chi-square test for difference in other tobacco product use between past 30-day e-cigarette users and non-users (\**P*<0.001)

2. P-for-linear trend, 2011-2015

3. Non-cigarette combustibles include cigars, pipes, bidis, and kreteks (2011-2013)

4. Smokeless tobacco includes conventional smokeless tobacco, snus, and dissolvable tobacco

Marginal prevalences adjusted across years for grade in school and race/ethnicity

Abbreviations: n = sample size (denominator); SE = standard error

**S2. Table 3.** Cigarette use intensity and quit intentions according to past month use (yes or no) of electronic cigarettes, 2011-2015

*COMPLETE CASE ANALYSIS: participants with missing values excluded; no imputation*

|                                              | Females, grades 6-12                                |                                                     |                        |                     |       |                                                     | Males, grades 6-12                                  |                        |       |                     |       |                     |
|----------------------------------------------|-----------------------------------------------------|-----------------------------------------------------|------------------------|---------------------|-------|-----------------------------------------------------|-----------------------------------------------------|------------------------|-------|---------------------|-------|---------------------|
|                                              | All past 30-day cigarette users<br>(n: sample size) | Concurrent past 30-day e-cigarette use <sup>1</sup> |                        |                     |       | All past 30-day cigarette users<br>(n: sample size) | Concurrent past 30-day e-cigarette use <sup>1</sup> |                        |       |                     |       |                     |
|                                              |                                                     | Yes<br>(n: sample size)                             | No<br>(n: sample size) |                     |       |                                                     | Yes<br>(n: sample size)                             | No<br>(n: sample size) |       |                     |       |                     |
| <b>Cigarettes all 30 days in past month:</b> |                                                     |                                                     |                        |                     |       |                                                     |                                                     |                        |       |                     |       |                     |
|                                              | n                                                   | % all 30 (SE)                                       | n                      | % all 30 (SE)       | n     | % all 30 (SE)                                       | n                                                   | % all 30 (SE)          | n     | % all 30 (SE)       | n     | % all 30 (SE)       |
| All years                                    | 2,932                                               | 19.9 (1.0)                                          | 727                    | 26.4 (2.0)          | 2,205 | 17.7 (1.1) *                                        | 3,635                                               | 22.7 (1.0)             | 1,077 | 29.5 (1.9)          | 2,558 | 19.8 (1.1) *        |
| 2011                                         | 718                                                 | 20.2 (2.3)                                          | - <sup>2</sup>         | -                   | 679   | 19.3 (2.3)                                          | 844                                                 | 25.2 (1.9)             | 70    | 54.5 (7.5)          | 774   | 22.0 (1.8)          |
| 2012                                         | 814                                                 | 18.8 (1.8)                                          | 124                    | 31.2 (5.4)          | 690   | 16.6 (1.6)                                          | 1,054                                               | 22.8 (1.7)             | 221   | 40.1 (4.0)          | 833   | 18.4 (1.6) *        |
| 2013                                         | 585                                                 | 21.4 (2.4)                                          | 122                    | 32.8 (4.7)          | 463   | 18.2 (2.6)                                          | 645                                                 | 23.1 (2.1)             | 176   | 26.1 (3.9)          | 469   | 21.7 (2.7)          |
| 2014                                         | 460                                                 | 21.2 (2.5)                                          | 249                    | 25.5 (3.7)          | 211   | 16.5 (3.1)                                          | 625                                                 | 20.6 (2.6)             | 331   | 23.8 (3.9)          | 294   | 17.2 (3.3)          |
| 2015                                         | 355                                                 | 16.7 (2.4)                                          | 193                    | 19.7 (3.4)          | 162   | 13.6 (3.0)                                          | 467                                                 | 21.0 (3.2)             | 279   | 22.9 (3.0)          | 188   | 18.2 (6.2)          |
| Trend <sup>3</sup>                           |                                                     | 0.714                                               |                        | 0.009               |       | 0.258                                               |                                                     | 0.077                  |       | <0.001              |       | 0.118               |
| <b>Smoked &gt;10 cigarettes/day:</b>         |                                                     |                                                     |                        |                     |       |                                                     |                                                     |                        |       |                     |       |                     |
|                                              | n                                                   | % 10/day (SE)                                       | n                      | % 10/day (SE)       | n     | % 10/day (SE)                                       | n                                                   | % 10/day (SE)          | n     | % 10/day (SE)       | n     | % 10/day (SE)       |
| All years                                    | 2,932                                               | 5.5 (0.5)                                           | 727                    | 8.9 (1.2)           | 2,205 | 4.3 (0.5) *                                         | 3,635                                               | 11.2 (0.7)             | 1,077 | 16.2 (1.6)          | 2,558 | 9.1 (0.7) *         |
| 2011                                         | 718                                                 | 5.1 (0.9)                                           | - <sup>2</sup>         | -                   | 679   | 4.9 (0.9)                                           | 844                                                 | 11.3 (1.2)             | 70    | 34.2 (7.5)          | 774   | 8.7 (1.0)           |
| 2012                                         | 814                                                 | 4.6 (0.8)                                           | 124                    | 7.4 (2.8)           | 690   | 4.0 (0.8)                                           | 1,054                                               | 12.9 (1.4)             | 221   | 20.9 (3.3)          | 833   | 11.1 (1.4)          |
| 2013                                         | 585                                                 | 6.6 (1.3)                                           | 122                    | 12.9 (3.9)          | 463   | 4.9 (1.2)                                           | 645                                                 | 11.8 (1.3)             | 176   | 16.6 (3.4)          | 469   | 9.6 (1.6)           |
| 2014                                         | 460                                                 | 7.0 (1.4)                                           | 249                    | 10.1 (2.2)          | 211   | 3.2 (1.3)                                           | 625                                                 | 9.8 (2.3)              | 331   | 12.1 (3.6)          | 294   | 7.3 (2.8)           |
| 2015                                         | 355                                                 | 4.7 (1.2)                                           | 193                    | 6.5 (2.4)           | 162   | 2.6 (1.4)                                           | 467                                                 | 9.8 (1.6)              | 279   | 11.2 (2.0)          | 188   | 7.9 (3.1)           |
| Trend <sup>3</sup>                           |                                                     | 0.613                                               |                        | 0.188               |       | 0.299                                               |                                                     | 0.144                  |       | <0.001              |       | 0.261               |
| <b>Cigarette quit attempt in past year:</b>  |                                                     |                                                     |                        |                     |       |                                                     |                                                     |                        |       |                     |       |                     |
|                                              | n                                                   | % quit attempt (SE)                                 | n                      | % quit attempt (SE) | n     | % quit attempt (SE)                                 | n                                                   | % quit attempt (SE)    | n     | % quit attempt (SE) | n     | % quit attempt (SE) |
| All years                                    | 2,932                                               | 59.4 (1.1)                                          | 727                    | 61.7 (2.2)          | 2,205 | 58.6 (1.3)                                          | 3,635                                               | 56.5 (1.1)             | 1,077 | 55.8 (1.9)          | 2,558 | 56.8 (1.3)          |
| 2011                                         | 718                                                 | 58.6 (2.4)                                          | - <sup>2</sup>         | -                   | 679   | 59.0 (2.5)                                          | 844                                                 | 55.9 (2.4)             | 70    | 55.7 (6.7)          | 774   | 55.9 (2.4)          |
| 2012                                         | 814                                                 | 59.7 (2.2)                                          | 124                    | 60.2 (6.0)          | 690   | 59.6 (2.2)                                          | 1,054                                               | 54.9 (1.9)             | 221   | 51.7 (4.6)          | 833   | 55.5 (2.3)          |
| 2013                                         | 585                                                 | 56.8 (2.2)                                          | 122                    | 54.5 (4.8)          | 463   | 57.4 (2.6)                                          | 645                                                 | 58.1 (2.3)             | 176   | 57.4 (4.1)          | 469   | 59.1 (2.9)          |
| 2014                                         | 460                                                 | 58.8 (2.7)                                          | 249                    | 59.3 (3.7)          | 211   | 57.7 (4.5)                                          | 625                                                 | 59.7 (2.9)             | 331   | 58.0 (4.2)          | 294   | 61.0 (4.3)          |
| 2015                                         | 355                                                 | 66.2 (4.0)                                          | 193                    | 72.5 (5.3)          | 162   | 57.6 (5.5)                                          | 467                                                 | 57.5 (4.0)             | 279   | 58.1 (5.3)          | 188   | 55.0 (5.4)          |
| Trend <sup>3</sup>                           |                                                     | 0.241                                               |                        | 0.037               |       | 0.609                                               |                                                     | 0.551                  |       | 0.750               |       | 0.568               |
| <b>Thinking about quitting cigarettes:</b>   |                                                     |                                                     |                        |                     |       |                                                     |                                                     |                        |       |                     |       |                     |
|                                              | n                                                   | % think quit (SE)                                   | n                      | % think quit (SE)   | n     | % think quit (SE)                                   | n                                                   | % think quit (SE)      | n     | % think quit (SE)   | n     | % think quit (SE)   |
| All years                                    | 2,932                                               | 57.8 (1.3)                                          | 727                    | 58.7 (2.4)          | 2,205 | 57.5 (1.6)                                          | 3,635                                               | 56.4 (1.2)             | 1,077 | 56.6 (2.0)          | 2,558 | 56.4 (1.4)          |
| 2011                                         | 718                                                 | 51.8 (3.3)                                          | - <sup>2</sup>         | -                   | 679   | 52.0 (3.4)                                          | 844                                                 | 45.5 (2.4)             | 70    | 43.1 (9.0)          | 774   | 45.7 (2.4)          |
| 2012                                         | 814                                                 | 64.0 (1.9)                                          | 124                    | 63.0 (5.8)          | 690   | 64.3 (2.0)                                          | 1,054                                               | 64.6 (1.7)             | 221   | 55.2 (4.1)          | 833   | 67.4 (2.0)          |
| 2013                                         | 585                                                 | 55.4 (3.0)                                          | 122                    | 50.6 (6.0)          | 463   | 56.8 (3.3)                                          | 645                                                 | 56.0 (2.8)             | 176   | 57.3 (5.3)          | 469   | 56.1 (3.4)          |
| 2014                                         | 460                                                 | 60.0 (2.5)                                          | 249                    | 59.0 (3.8)          | 211   | 60.4 (3.5)                                          | 625                                                 | 61.8 (2.8)             | 331   | 59.2 (3.5)          | 294   | 63.9 (5.1)          |
| 2015                                         | 355                                                 | 61.5 (3.7)                                          | 193                    | 62.8 (4.8)          | 162   | 59.9 (4.6)                                          | 467                                                 | 61.0 (4.5)             | 279   | 61.6 (5.1)          | 188   | 59.5 (5.9)          |
| Trend <sup>3</sup>                           |                                                     | 0.108                                               |                        | 0.459               |       | 0.173                                               |                                                     | 0.006                  |       | 0.170               |       | 0.006               |
| <b>Thinking about quitting all tobacco:</b>  |                                                     |                                                     |                        |                     |       |                                                     |                                                     |                        |       |                     |       |                     |
|                                              | n                                                   | % think quit (SE)                                   | n                      | % think quit (SE)   | n     | % think quit (SE)                                   | n                                                   | % think quit (SE)      | n     | % think quit (SE)   | n     | % think quit (SE)   |
| All years                                    | 2,932                                               | 52.6 (1.3)                                          | 727                    | 46.6 (2.2)          | 2,205 | 54.9 (1.5)                                          | 3,635                                               | 46.9 (1.1)             | 1,077 | 43.0 (2.1)          | 2,558 | 48.7 (1.3)          |
| 2011                                         | 718                                                 | 54.8 (2.8)                                          | - <sup>2</sup>         | -                   | 679   | 54.7 (2.8)                                          | 844                                                 | 43.4 (2.0)             | 70    | 43.4 (7.7)          | 774   | 43.4 (2.0)          |
| 2012                                         | 814                                                 | 59.2 (2.3)                                          | 124                    | 53.0 (5.7)          | 690   | 60.2 (2.4)                                          | 1,054                                               | 55.8 (2.0)             | 221   | 50.7 (4.5)          | 833   | 57.2 (2.2)          |
| 2013                                         | 585                                                 | 50.4 (2.9)                                          | 122                    | 47.0 (5.3)          | 463   | 51.7 (3.3)                                          | 645                                                 | 50.4 (3.0)             | 176   | 48.2 (5.5)          | 469   | 52.0 (3.2)          |
| 2014                                         | 460                                                 | 42.8 (2.6)                                          | 249                    | 38.7 (4.0)          | 211   | 48.8 (4.1)                                          | 625                                                 | 41.5 (3.0)             | 331   | 39.0 (3.4)          | 294   | 43.7 (4.9)          |
| 2015                                         | 355                                                 | 54.6 (4.7)                                          | 193                    | 52.0 (4.1)          | 162   | 57.0 (6.5)                                          | 467                                                 | 42.6 (4.1)             | 279   | 41.3 (5.6)          | 188   | 44.2 (5.0)          |
| Trend <sup>3</sup>                           |                                                     | 0.030                                               |                        | 0.300               |       | 0.378                                               |                                                     | 0.073                  |       | 0.045               |       | 0.973               |

Among past 30-day cigarette users, past 30-day e-cigarette use was not associated with quit attempts or intentions.

1. Chi-square test for difference in cigarette smoking intensity or quit behavior/intentions between past 30-day cigarette users with or without past 30-day e-cigarette use (\*P<0.001)

2. Estimates suppressed due to sample size (n < 50)

3. P-for-linear trend, 2011-2015

Marginal percentages adjusted across years for grade in school and race/ethnicity

Abbreviations: n = sample size (denominator); SE = standard error

**S2. Table 4.** Electronic cigarette ever use and past month use according to ever use (yes or no) and past month use (yes or no) of other tobacco products, 2011-2013

YEAR 2014 & 2015 DATA EXCLUDED

| <b>Females, grades 6-12</b>            |        |                                            |                        |                             |        |                                                   |                        |                      |       |                             |        |                             |
|----------------------------------------|--------|--------------------------------------------|------------------------|-----------------------------|--------|---------------------------------------------------|------------------------|----------------------|-------|-----------------------------|--------|-----------------------------|
| Overall<br>(n: sample size)            |        | Ever use of any other tobacco <sup>1</sup> |                        |                             |        | Past 30-day use of any other tobacco <sup>1</sup> |                        |                      |       |                             |        |                             |
|                                        |        | Yes<br>(n: sample size)                    | No<br>(n: sample size) | p-value <sup>2</sup>        |        | Yes<br>(n: sample size)                           | No<br>(n: sample size) | p-value <sup>2</sup> |       |                             |        |                             |
| <b>Ever use of e-cigarettes:</b>       |        |                                            |                        |                             |        |                                                   |                        |                      |       |                             |        |                             |
|                                        | n      | % e-cigarette<br>ever (SE)                 | n                      | % e-cigarette<br>ever (SE)  | n      | % e-cigarette<br>ever (SE)                        |                        |                      | n     | % e-cigarette<br>ever (SE)  | n      | % e-cigarette<br>ever (SE)  |
| All years                              | 30,767 | 5.0 (0.3)                                  | 9,644                  | 15.2 (0.6)                  | 21,123 | 0.5 (0.1)                                         | <0.001                 |                      | 4,003 | 23.9 (1.1)                  | 26,764 | 2.2 (0.2)                   |
| 2011                                   | 9,315  | 2.5 (0.3)                                  | 3,091                  | 7.2 (0.8)                   | 6,224  | 0.2 (0.1)                                         | <0.001                 |                      | 1,263 | 12.6 (1.4)                  | 8,052  | 0.9 (0.2)                   |
| 2012                                   | 12,275 | 5.6 (0.5)                                  | 3,622                  | 17.5 (1.1)                  | 8,653  | 0.5 (0.1)                                         | <0.001                 |                      | 1,510 | 27.0 (1.9)                  | 10,765 | 2.5 (0.3)                   |
| 2013                                   | 9,177  | 7.0 (0.5)                                  | 2,931                  | 21.7 (1.4)                  | 6,246  | 0.7 (0.2)                                         | <0.001                 |                      | 1,230 | 33.0 (2.4)                  | 7,947  | 3.3 (0.4)                   |
| Trend <sup>3</sup>                     |        | <0.001                                     |                        | <0.001                      |        | 0.009                                             |                        |                      |       | <0.001                      |        | <0.001                      |
| <b>Past month use of e-cigarettes:</b> |        |                                            |                        |                             |        |                                                   |                        |                      |       |                             |        |                             |
|                                        | n      | % e-cig. past<br>month (SE)                | n                      | % e-cig. past<br>month (SE) | n      | % e-cig. past<br>month (SE)                       |                        |                      | n     | % e-cig. past<br>month (SE) | n      | % e-cig. past<br>month (SE) |
| All years                              | 30,767 | 1.5 (0.1)                                  | 9,644                  | 4.4 (0.3)                   | 21,123 | 0.2 (0.1)                                         | <0.001                 |                      | 4,003 | 9.2 (0.7)                   | 26,764 | 0.3 (0.1)                   |
| 2011                                   | 9,315  | 0.6 (0.1)                                  | 3,091                  | 1.6 (0.3)                   | 6,224  | 0.1 (0.0)                                         | <0.001                 |                      | 1,263 | 3.4 (0.7)                   | 8,052  | 0.1 (0.1)                   |
| 2012                                   | 12,275 | 1.4 (0.2)                                  | 3,622                  | 4.5 (0.5)                   | 8,653  | 0.1 (0.1)                                         | <0.001                 |                      | 1,510 | 10.1 (1.1)                  | 10,765 | 0.2 (0.1)                   |
| 2013                                   | 9,177  | 2.4 (0.3)                                  | 2,931                  | 7.3 (0.8)                   | 6,246  | 0.3 (0.2)                                         | <0.001                 |                      | 1,230 | 14.4 (1.8)                  | 7,947  | 0.7 (0.1)                   |
| Trend <sup>3</sup>                     |        | <0.001                                     |                        | <0.001                      |        | 0.146                                             |                        |                      |       | <0.001                      |        | <0.001                      |
| <b>Males, grades 6-12</b>              |        |                                            |                        |                             |        |                                                   |                        |                      |       |                             |        |                             |
| Overall<br>(n: sample size)            |        | Ever use of any other tobacco <sup>1</sup> |                        |                             |        | Past 30-day use of any other tobacco <sup>1</sup> |                        |                      |       |                             |        |                             |
|                                        |        | Yes<br>(n: sample size)                    | No<br>(n: sample size) | p-value <sup>2</sup>        |        | Yes<br>(n: sample size)                           | No<br>(n: sample size) | p-value <sup>2</sup> |       |                             |        |                             |
| <b>Ever use of e-cigarettes:</b>       |        |                                            |                        |                             |        |                                                   |                        |                      |       |                             |        |                             |
|                                        | n      | % e-cigarette<br>ever (SE)                 | n                      | % e-cigarette<br>ever (SE)  | n      | % e-cigarette<br>ever (SE)                        |                        |                      | n     | % e-cigarette<br>ever (SE)  | n      | % e-cigarette<br>ever (SE)  |
| All years                              | 30,869 | 7.4 (0.3)                                  | 11,797                 | 18.7 (0.7)                  | 19,072 | 0.5 (0.1)                                         | <0.001                 |                      | 5,950 | 28.5 (1.1)                  | 24,919 | 2.3 (0.2)                   |
| 2011                                   | 9,284  | 4.2 (0.5)                                  | 3,793                  | 10.1 (1.2)                  | 5,491  | 0.5 (0.2)                                         | <0.001                 |                      | 1,897 | 16.7 (1.8)                  | 7,387  | 1.0 (0.2)                   |
| 2012                                   | 12,369 | 8.3 (0.6)                                  | 4,566                  | 21.7 (1.3)                  | 7,803  | 0.4 (0.1)                                         | <0.001                 |                      | 2,363 | 32.5 (2.1)                  | 10,006 | 2.5 (0.3)                   |
| 2013                                   | 9,216  | 9.6 (0.6)                                  | 3,438                  | 24.6 (1.4)                  | 5,778  | 0.7 (0.2)                                         | <0.001                 |                      | 1,690 | 37.6 (1.9)                  | 7,526  | 3.3 (0.4)                   |
| Trend <sup>3</sup>                     |        | <0.001                                     |                        | <0.001                      |        | 0.394                                             |                        |                      |       | <0.001                      |        | <0.001                      |
| <b>Past month use of e-cigarettes:</b> |        |                                            |                        |                             |        |                                                   |                        |                      |       |                             |        |                             |
|                                        | n      | % e-cig. past<br>month (SE)                | n                      | % e-cig. past<br>month (SE) | n      | % e-cig. past<br>month (SE)                       |                        |                      | n     | % e-cig. past<br>month (SE) | n      | % e-cig. past<br>month (SE) |
| All years                              | 30,869 | 2.7 (0.2)                                  | 11,797                 | 6.9 (0.5)                   | 19,072 | 0.2 (0.1)                                         | <0.001                 |                      | 5,950 | 12.3 (0.9)                  | 24,919 | 0.4 (0.1)                   |
| 2011                                   | 9,284  | 1.6 (0.3)                                  | 3,793                  | 3.8 (0.6)                   | 5,491  | 0.2 (0.1)                                         | <0.001                 |                      | 1,897 | 6.9 (1.1)                   | 7,387  | 0.2 (0.1)                   |
| 2012                                   | 12,369 | 2.8 (0.4)                                  | 4,566                  | 7.3 (0.8)                   | 7,803  | 0.2 (0.1)                                         | <0.001                 |                      | 2,363 | 12.8 (1.4)                  | 10,006 | 0.4 (0.1)                   |
| 2013                                   | 9,216  | 3.7 (0.4)                                  | 3,438                  | 9.6 (1.0)                   | 5,778  | 0.3 (0.1)                                         | <0.001                 |                      | 1,690 | 17.8 (1.8)                  | 7,526  | 0.7 (0.1)                   |
| Trend <sup>3</sup>                     |        | <0.001                                     |                        | <0.001                      |        | 0.355                                             |                        |                      |       | <0.001                      |        | 0.013                       |

In all years, e-cigarette use was associated with use of other tobacco products, but e-cigarette use prevalence increased among both other tobacco users and other tobacco non-users.

1. Other tobacco includes: cigarettes, cigars, pipes, bidis, kreteks (2011-2013), conventional smokeless tobacco, snus, dissolvable tobacco, and hookah.
2. Chi-square test for difference in use of e-cigarettes between users and non-users of other tobacco products
3. P-for-linear trend, 2011-2013

Marginal percentages adjusted across years for grade in school and race/ethnicity.

Subgroup sample sizes (n) are the mean sample size over 10 imputations for missing value assignment.

Abbreviations: n = sample size (denominator); SE = standard error

**S2. Table 5.** Past month use of other tobacco products according to past month use (yes or no) of electronic cigarettes, 2011-2013

YEAR 2014 & 2015 DATA EXCLUDED

|                                                              | Females, grades 6-12        |                                          |                        |                      |        |                             | Males, grades 6-12                       |                        |                      |     |                      |        |                    |   |
|--------------------------------------------------------------|-----------------------------|------------------------------------------|------------------------|----------------------|--------|-----------------------------|------------------------------------------|------------------------|----------------------|-----|----------------------|--------|--------------------|---|
|                                                              | Overall<br>(n: sample size) | Past 30-day e-cigarette use <sup>1</sup> |                        |                      |        | Overall<br>(n: sample size) | Past 30-day e-cigarette use <sup>1</sup> |                        |                      |     |                      |        |                    |   |
|                                                              |                             | Yes<br>(n: sample size)                  | No<br>(n: sample size) |                      |        |                             | Yes<br>(n: sample size)                  | No<br>(n: sample size) |                      |     |                      |        |                    |   |
| <b>Any other tobacco in past month:</b>                      |                             |                                          |                        |                      |        |                             |                                          |                        |                      |     |                      |        |                    |   |
|                                                              | n                           | % other tobacco (SE)                     | n                      | % other tobacco (SE) | n      | % other tobacco (SE)        | *                                        | n                      | % other tobacco (SE) | n   | % other tobacco (SE) | *      |                    |   |
| All years                                                    | 30,767                      | 12.9 (0.4)                               | 462                    | 80.6 (3.0)           | 30,305 | 11.9 (0.4)                  | *                                        | 30,869                 | 19.3 (0.5)           | 804 | 86.8 (1.8)           | 30,065 | 17.4 (0.5)         | * |
| 2011                                                         | 9,315                       | 13.4 (0.8)                               | 69                     | 81.8 (7.4)           | 9,246  | 13.0 (0.7)                  | *                                        | 9,284                  | 20.6 (1.0)           | 130 | 88.7 (4.2)           | 9,154  | 19.4 (1.0)         | * |
| 2012                                                         | 12,275                      | 12.6 (0.7)                               | 180                    | 89.4 (2.9)           | 12,095 | 11.4 (0.6)                  | *                                        | 12,369                 | 19.3 (0.8)           | 342 | 88.0 (3.0)           | 12,027 | 17.3 (0.8)         | * |
| 2013                                                         | 9,177                       | 12.8 (0.6)                               | 213                    | 74.5 (5.0)           | 8,964  | 11.3 (0.6)                  | *                                        | 9,216                  | 18.0 (0.9)           | 332 | 85.0 (2.7)           | 8,884  | 15.4 (1.0)         | * |
| Trend <sup>2</sup>                                           |                             | 0.515                                    |                        | 0.212                |        | 0.067                       |                                          |                        | 0.061                |     | 0.398                |        | 0.004              |   |
| <b>Cigarettes in past month:</b>                             |                             |                                          |                        |                      |        |                             |                                          |                        |                      |     |                      |        |                    |   |
|                                                              | n                           | % cigarettes (SE)                        | n                      | % cigarettes (SE)    | n      | % cigarettes (SE)           | *                                        | n                      | % cigarettes (SE)    | n   | % cigarettes (SE)    | n      | % cigarettes (SE)  | * |
| All years                                                    | 30,767                      | 8.6 (0.4)                                | 462                    | 70.9 (3.2)           | 30,305 | 7.6 (0.3)                   | *                                        | 30,869                 | 10.9 (0.4)           | 804 | 70.5 (2.7)           | 30,065 | 9.3 (0.4)          | * |
| 2011                                                         | 9,315                       | 9.7 (0.8)                                | 69                     | 75.4 (7.8)           | 9,246  | 9.3 (0.8)                   | *                                        | 9,284                  | 12.2 (0.8)           | 130 | 73.5 (6.2)           | 9,154  | 11.1 (0.8)         | * |
| 2012                                                         | 12,275                      | 8.1 (0.6)                                | 180                    | 79.2 (4.7)           | 12,095 | 7.1 (0.5)                   | *                                        | 12,369                 | 11.1 (0.7)           | 342 | 74.9 (3.8)           | 12,027 | 9.2 (0.6)          | * |
| 2013                                                         | 9,177                       | 7.8 (0.5)                                | 213                    | 64.7 (5.2)           | 8,964  | 6.4 (0.5)                   | *                                        | 9,216                  | 9.6 (0.7)            | 332 | 65.9 (4.5)           | 8,884  | 7.4 (0.6)          | * |
| Trend <sup>2</sup>                                           |                             | 0.056                                    |                        | 0.167                |        | 0.002                       |                                          |                        | 0.012                |     | 0.229                |        | <0.001             |   |
| <b>Non-cigarette combustibles<sup>3</sup> in past month:</b> |                             |                                          |                        |                      |        |                             |                                          |                        |                      |     |                      |        |                    |   |
|                                                              | n                           | % combustible (SE)                       | n                      | % combustible (SE)   | n      | % combustible (SE)          | *                                        | n                      | % combustible (SE)   | n   | % combustible (SE)   | n      | % combustible (SE) | * |
| All years                                                    | 30,767                      | 7.2 (0.1)                                | 462                    | 48.8 (4.1)           | 30,305 | 6.6 (0.3)                   | *                                        | 30,869                 | 12.1 (0.3)           | 804 | 64.9 (2.4)           | 30,065 | 10.6 (0.3)         | * |
| 2011                                                         | 9,315                       | 6.9 (0.4)                                | 69                     | 44.7 (10.1)          | 9,246  | 6.7 (0.4)                   | *                                        | 9,284                  | 12.5 (0.6)           | 130 | 66.4 (6.3)           | 9,154  | 11.5 (0.5)         | * |
| 2012                                                         | 12,275                      | 7.3 (0.5)                                | 180                    | 53.1 (4.9)           | 12,095 | 6.6 (0.4)                   | *                                        | 12,369                 | 12.3 (0.6)           | 342 | 68.0 (4.1)           | 12,027 | 10.6 (0.5)         | * |
| 2013                                                         | 9,177                       | 7.5 (0.5)                                | 213                    | 47.1 (6.1)           | 8,964  | 6.5 (0.5)                   | *                                        | 9,216                  | 11.6 (0.6)           | 332 | 61.9 (3.4)           | 8,884  | 9.7 (0.6)          | * |
| Trend <sup>2</sup>                                           |                             | 0.387                                    |                        | 0.894                |        | 0.783                       |                                          |                        | 0.336                |     | 0.388                |        | 0.027              |   |
| <b>Smokeless tobacco<sup>4</sup> in past month:</b>          |                             |                                          |                        |                      |        |                             |                                          |                        |                      |     |                      |        |                    |   |
|                                                              | n                           | % smokeless (SE)                         | n                      | % smokeless (SE)     | n      | % smokeless (SE)            | *                                        | n                      | % smokeless (SE)     | n   | % smokeless (SE)     | n      | % smokeless (SE)   | * |
| All years                                                    | 30,767                      | 2.0 (0.1)                                | 462                    | 23.6 (3.5)           | 30,305 | 1.7 (0.1)                   | *                                        | 30,869                 | 8.0 (0.4)            | 804 | 38.9 (2.7)           | 30,065 | 7.2 (0.4)          | * |
| 2011                                                         | 9,315                       | 2.1 (0.2)                                | 69                     | 27.1 (8.9)           | 9,246  | 2.0 (0.2)                   | *                                        | 9,284                  | 9.2 (0.9)            | 130 | 52.0 (7.2)           | 9,154  | 8.4 (0.9)          | * |
| 2012                                                         | 12,275                      | 2.2 (0.2)                                | 180                    | 28.9 (4.5)           | 12,095 | 1.8 (0.2)                   | *                                        | 12,369                 | 8.2 (0.6)            | 342 | 45.2 (3.9)           | 12,027 | 7.1 (0.6)          | * |
| 2013                                                         | 9,177                       | 1.8 (0.2)                                | 213                    | 19.6 (5.2)           | 8,964  | 1.3 (0.2)                   | *                                        | 9,216                  | 6.7 (0.7)            | 332 | 28.8 (3.8)           | 8,884  | 5.9 (0.7)          | * |
| Trend <sup>2</sup>                                           |                             | 0.264                                    |                        | 0.287                |        | 0.035                       |                                          |                        | 0.046                |     | 0.002                |        | 0.027              |   |
| <b>Hookah in past month:</b>                                 |                             |                                          |                        |                      |        |                             |                                          |                        |                      |     |                      |        |                    |   |
|                                                              | n                           | % hookah (SE)                            | n                      | % hookah (SE)        | n      | % hookah (SE)               | *                                        | n                      | % hookah (SE)        | n   | % hookah (SE)        | n      | % hookah (SE)      | * |
| All years                                                    | 30,767                      | 2.9 (0.2)                                | 462                    | 27.6 (3.0)           | 30,305 | 2.6 (0.2)                   | *                                        | 30,869                 | 3.7 (0.2)            | 804 | 32.9 (2.5)           | 30,065 | 2.9 (0.2)          | * |
| 2011                                                         | 9,315                       | 2.5 (0.3)                                | 69                     | 20.7 (7.7)           | 9,246  | 2.3 (0.3)                   | *                                        | 9,284                  | 3.2 (0.4)            | 130 | 31.9 (6.0)           | 9,154  | 2.7 (0.4)          | * |
| 2012                                                         | 12,275                      | 3.0 (0.3)                                | 180                    | 27.9 (4.2)           | 12,095 | 2.7 (0.3)                   | *                                        | 12,369                 | 4.2 (0.4)            | 342 | 37.6 (4.1)           | 12,027 | 3.3 (0.3)          | * |
| 2013                                                         | 9,177                       | 3.3 (0.3)                                | 213                    | 29.0 (4.8)           | 8,964  | 2.7 (0.3)                   | *                                        | 9,216                  | 3.6 (0.3)            | 332 | 29.8 (3.5)           | 8,884  | 2.6 (0.3)          | * |
| Trend <sup>2</sup>                                           |                             | 0.038                                    |                        | 0.422                |        | 0.347                       |                                          |                        | 0.428                |     | 0.540                |        | 0.821              |   |

As past month e-cigarette use increased, use became less exclusively associated with combustible tobacco use.

1. Chi-square test for difference in use of other tobacco products between past 30-day e-cigarette users and non-users (\*P<0.001)
2. P-for-linear trend, 2011-2013
3. Non-cigarette combustibles include cigars, pipes, bidis, and kreteks (2011-2013)
4. Smokeless tobacco includes conventional smokeless tobacco, snus, and dissolvable tobacco

Marginal prevalences adjusted across years for grade in school and race/ethnicity

Subgroup sample sizes (n) are the mean sample size over 10 imputations for missing value assignment.

Abbreviations: n = sample size (denominator); SE = standard error

**S2. Table 6.** Cigarette use intensity and quit intentions according to past month use (yes or no) of electronic cigarettes, 2011-2013

YEAR 2014 & 2015 DATA EXCLUDED

|                                              | Females, grades 6-12                                |                                                     |                        |                     |                         |                                                     | Males, grades 6-12                                  |                     |       |                     |       |                     |
|----------------------------------------------|-----------------------------------------------------|-----------------------------------------------------|------------------------|---------------------|-------------------------|-----------------------------------------------------|-----------------------------------------------------|---------------------|-------|---------------------|-------|---------------------|
|                                              | All past 30-day cigarette users<br>(n: sample size) | Concurrent past 30-day e-cigarette use <sup>1</sup> |                        |                     |                         | All past 30-day cigarette users<br>(n: sample size) | Concurrent past 30-day e-cigarette use <sup>1</sup> |                     |       |                     |       |                     |
|                                              |                                                     | Yes<br>(n: sample size)                             | No<br>(n: sample size) |                     | Yes<br>(n: sample size) |                                                     | No<br>(n: sample size)                              |                     |       |                     |       |                     |
| <b>Cigarettes all 30 days in past month:</b> |                                                     |                                                     |                        |                     |                         |                                                     |                                                     |                     |       |                     |       |                     |
|                                              | n                                                   | % all 30 (SE)                                       | n                      | % all 30 (SE)       | n                       | % all 30 (SE)                                       | n                                                   | % all 30 (SE)       | n     | % all 30 (SE)       | n     | % all 30 (SE)       |
| All years                                    | 3,180                                               | 21.3 (1.1)                                          | 642                    | 34.0 (4.1)          | 2,538                   | 19.4 (1.3) *                                        | 4,280                                               | 25.2 (1.1)          | 1,053 | 36.9 (3.0)          | 3,227 | 22.6 (1.2) *        |
| 2011                                         | 893                                                 | 21.1 (1.9)                                          | - <sup>2</sup>         | -                   | 847                     | 20.1 (2.0)                                          | 1,165                                               | 26.4 (1.8)          | 93    | 53.3 (7.5)          | 1,072 | 23.3 (2.0) *        |
| 2012                                         | 970                                                 | 20.2 (1.8)                                          | 145                    | 31.1 (6.6)          | 825                     | 18.3 (2.0)                                          | 1,349                                               | 23.8 (1.8)          | 260   | 38.6 (4.7)          | 1,089 | 20.2 (1.9) *        |
| 2013                                         | 740                                                 | 22.6 (2.3)                                          | 143                    | 34.7 (5.6)          | 597                     | 19.5 (2.9)                                          | 894                                                 | 25.3 (2.1)          | 230   | 27.6 (4.6)          | 664   | 24.5 (2.8)          |
| Trend <sup>3</sup>                           |                                                     | 0.658                                               |                        | 0.931               |                         | 0.814                                               |                                                     | 0.644               |       | 0.004               |       | 0.849               |
| <b>Smoked &gt;10 cigarettes/day:</b>         |                                                     |                                                     |                        |                     |                         |                                                     |                                                     |                     |       |                     |       |                     |
|                                              | n                                                   | % 10/day (SE)                                       | n                      | % 10/day (SE)       | n                       | % 10/day (SE)                                       | n                                                   | % 10/day (SE)       | n     | % 10/day (SE)       | n     | % 10/day (SE)       |
| All years                                    | 3,180                                               | 6.8 (0.6)                                           | 642                    | 12.6 (3.4)          | 2,538                   | 5.9 (0.8)                                           | 4,280                                               | 13.8 (0.7)          | 1,053 | 22.8 (2.7)          | 3,227 | 11.8 (0.8) *        |
| 2011                                         | 893                                                 | 6.1 (0.8)                                           | - <sup>2</sup>         | -                   | 847                     | 5.7 (0.9)                                           | 1,165                                               | 13.6 (1.3)          | 93    | 37.2 (8.1)          | 1,072 | 10.7 (1.4) *        |
| 2012                                         | 970                                                 | 6.4 (1.0)                                           | 145                    | 8.7 (4.6)           | 825                     | 5.9 (1.3)                                           | 1,349                                               | 13.9 (1.3)          | 260   | 20.6 (3.9)          | 1,089 | 12.5 (1.5)          |
| 2013                                         | 740                                                 | 8.2 (1.3)                                           | 143                    | 16.1 (5.4)          | 597                     | 6.1 (1.8)                                           | 894                                                 | 14.0 (1.4)          | 230   | 17.6 (3.8)          | 664   | 12.6 (1.8)          |
| Trend <sup>3</sup>                           |                                                     | 0.195                                               |                        | 0.314               |                         | 0.846                                               |                                                     | 0.837               |       | 0.040               |       | 0.394               |
| <b>Cigarette quit attempt in past year:</b>  |                                                     |                                                     |                        |                     |                         |                                                     |                                                     |                     |       |                     |       |                     |
|                                              | n                                                   | % quit attempt (SE)                                 | n                      | % quit attempt (SE) | n                       | % quit attempt (SE)                                 | n                                                   | % quit attempt (SE) | n     | % quit attempt (SE) | n     | % quit attempt (SE) |
| All years                                    | 3,180                                               | 59.8 (1.4)                                          | 642                    | 57.8 (3.8)          | 2,538                   | 60.1 (1.5)                                          | 4,280                                               | 57.2 (1.2)          | 1,053 | 54.6 (3.0)          | 3,227 | 57.8 (1.4)          |
| 2011                                         | 893                                                 | 59.6 (2.4)                                          | - <sup>2</sup>         | -                   | 847                     | 60.0 (2.6)                                          | 1,165                                               | 57.6 (2.3)          | 93    | 57.1 (6.7)          | 1,072 | 57.6 (2.5)          |
| 2012                                         | 970                                                 | 61.9 (2.4)                                          | 145                    | 60.6 (6.1)          | 825                     | 61.9 (2.4)                                          | 1,349                                               | 55.6 (2.0)          | 260   | 51.9 (5.3)          | 1,089 | 56.5 (2.4)          |
| 2013                                         | 740                                                 | 58.0 (2.7)                                          | 143                    | 56.7 (5.5)          | 597                     | 58.2 (3.0)                                          | 894                                                 | 58.6 (2.3)          | 230   | 55.7 (4.5)          | 664   | 59.9 (3.0)          |
| Trend <sup>3</sup>                           |                                                     | 0.718                                               |                        | 0.966               |                         | 0.737                                               |                                                     | 0.812               |       | 0.987               |       | 0.609               |
| <b>Thinking about quitting cigarettes:</b>   |                                                     |                                                     |                        |                     |                         |                                                     |                                                     |                     |       |                     |       |                     |
|                                              | n                                                   | % think quit (SE)                                   | n                      | % think quit (SE)   | n                       | % think quit (SE)                                   | n                                                   | % think quit (SE)   | n     | % think quit (SE)   | n     | % think quit (SE)   |
| All years                                    | 3,180                                               | 57.3 (1.7)                                          | 642                    | 55.1 (4.1)          | 2,538                   | 57.6 (1.8)                                          | 4,280                                               | 56.4 (1.3)          | 1,053 | 54.9 (3.2)          | 3,227 | 56.8 (1.6)          |
| 2011                                         | 893                                                 | 52.6 (3.3)                                          | - <sup>2</sup>         | -                   | 847                     | 52.8 (3.3)                                          | 1,165                                               | 47.8 (2.5)          | 93    | 48.7 (8.8)          | 1,072 | 47.7 (2.6)          |
| 2012                                         | 970                                                 | 64.7 (1.9)                                          | 145                    | 62.6 (6.0)          | 825                     | 65.0 (2.1)                                          | 1,349                                               | 64.7 (1.8)          | 260   | 56.5 (5.3)          | 1,089 | 67.0 (2.2)          |
| 2013                                         | 740                                                 | 55.2 (3.2)                                          | 143                    | 49.4 (6.5)          | 597                     | 56.5 (3.5)                                          | 894                                                 | 58.0 (2.6)          | 230   | 56.8 (4.9)          | 664   | 58.6 (3.2)          |
| Trend <sup>3</sup>                           |                                                     | 0.456                                               |                        | 0.339               |                         | 0.292                                               |                                                     | 0.002               |       | 0.480               |       | 0.002               |
| <b>Thinking about quitting all tobacco:</b>  |                                                     |                                                     |                        |                     |                         |                                                     |                                                     |                     |       |                     |       |                     |
|                                              | n                                                   | % think quit (SE)                                   | n                      | % think quit (SE)   | n                       | % think quit (SE)                                   | n                                                   | % think quit (SE)   | n     | % think quit (SE)   | n     | % think quit (SE)   |
| All years                                    | 3,180                                               | 55.6 (1.6)                                          | 642                    | 51.6 (4.1)          | 2,538                   | 56.3 (1.8)                                          | 4,280                                               | 50.3 (1.3)          | 1,053 | 50.5 (3.5)          | 3,227 | 50.5 (1.4)          |
| 2011                                         | 893                                                 | 54.7 (2.8)                                          | - <sup>2</sup>         | -                   | 847                     | 54.6 (2.8)                                          | 1,165                                               | 46.3 (2.0)          | 93    | 49.9 (7.6)          | 1,072 | 46.0 (2.2)          |
| 2012                                         | 970                                                 | 60.2 (2.4)                                          | 145                    | 54.3 (6.3)          | 825                     | 61.2 (2.6)                                          | 1,349                                               | 54.2 (2.0)          | 260   | 51.7 (5.0)          | 1,089 | 55.2 (2.2)          |
| 2013                                         | 740                                                 | 52.1 (3.0)                                          | 143                    | 48.0 (6.3)          | 597                     | 53.5 (3.7)                                          | 894                                                 | 50.9 (2.7)          | 230   | 49.9 (5.4)          | 664   | 51.8 (3.2)          |
| Trend <sup>3</sup>                           |                                                     | 0.615                                               |                        | 0.391               |                         | 0.978                                               |                                                     | 0.132               |       | 0.948               |       | 0.078               |

Among past 30-day cigarette users, past 30-day e-cigarette use was not associated with increased cigarette quit attempts or cessation intentions.

1. Chi-square test for difference in cigarette smoking intensity or quit behavior/intentions between past 30-day cigarette users with or without past 30-day e-cigarette use (\* $P < 0.001$ )
2. Estimates suppressed due to sample size ( $n < 50$ )
3. P-for-linear trend, 2011-2013

Marginal percentages adjusted across years for grade in school and race/ethnicity

Subgroup sample sizes (n) are the mean sample size over 10 imputations for missing value assignment.

Abbreviations: n = sample size (denominator); SE = standard error
